# Supplementary material for: sgRNAcas9: A Software Package for Designing CRISPR sgRNA and Evaluating Potential Off-Target Cleavage Sites
Source: PLoS One. 2014 Jun 23;9(6):e100448. doi: 10.1371/journal.pone.0100448 (PMC4067335; doi:10.1371/journal.pone.0100448)
Supplement: Table S3 — CRISPR target sites of human Emx1 gene found by sgRNAcas9.pl and the use of both strand searching mode. (XLS) [file pone.0100448.s003.xls]

## Sheet: Sheet1
Table S3. CRISPR target sites of human Emx1 gene found by sgRNAcas9.pl and the use of both strand searching mode.
sgRID	Start	End	CRISPR_target_sequence(5'-3')	Length(nt)	GC%
hEMX1_exon1_S_4	14	36	CCAATGGGCGAGCGCGGGGCAGG	23	0.783
hEMX1_exon1_S_5	44	66	TAACTCGCGCCTCGCAGCGCTGG	23	0.696
hEMX1_exon1_S_6	45	67	AACTCGCGCCTCGCAGCGCTGGG	23	0.739
hEMX1_exon1_S_18	81	103	GCAGGGCAGTGCGGGGACACCGG	23	0.783
hEMX1_exon1_S_19	82	104	CAGGGCAGTGCGGGGACACCGGG	23	0.783
hEMX1_exon1_S_20	83	105	AGGGCAGTGCGGGGACACCGGGG	23	0.783
hEMX1_exon1_S_22	88	110	AGTGCGGGGACACCGGGGGCTGG	23	0.783
hEMX1_exon1_S_28	115	137	GGTCCCAGCGGGACTCCGAAAGG	23	0.696
hEMX1_exon1_S_29	118	140	CCCAGCGGGACTCCGAAAGGAGG	23	0.696
hEMX1_exon1_S_30	119	141	CCAGCGGGACTCCGAAAGGAGGG	23	0.696
hEMX1_exon1_S_31	138	160	AGGGAGACGAGCTCAACCCTCGG	23	0.652
hEMX1_exon1_S_32	139	161	GGGAGACGAGCTCAACCCTCGGG	23	0.696
hEMX1_exon1_S_33	148	170	GCTCAACCCTCGGGCCTTACTGG	23	0.652
hEMX1_exon1_S_34	168	190	TGGCAGCTCGCAGCCTAGCACGG	23	0.696
hEMX1_exon1_S_39	242	264	CCGCGCCTGGCCGTACGCTGTGG	23	0.783
hEMX1_exon1_S_40	246	268	GCCTGGCCGTACGCTGTGGCCGG	23	0.783
hEMX1_exon1_S_41	255	277	TACGCTGTGGCCGGACCCCGCGG	23	0.783
hEMX1_exon1_S_63	366	388	CGGGCGGGTGTGCATGTGCCTGG	23	0.739
hEMX1_exon1_S_64	370	392	CGGGTGTGCATGTGCCTGGCTGG	23	0.696
hEMX1_exon1_S_65	371	393	GGGTGTGCATGTGCCTGGCTGGG	23	0.696
hEMX1_exon1_S_66	387	409	GGCTGGGTGCACACCCCGCAAGG	23	0.739
hEMX1_exon1_S_67	390	412	TGGGTGCACACCCCGCAAGGCGG	23	0.739
hEMX1_exon1_S_68	393	415	GTGCACACCCCGCAAGGCGGCGG	23	0.783
hEMX1_exon1_S_72	447	469	GCTGCCTCGCACAGCTCCCGCGG	23	0.783
hEMX1_exon1_S_73	471	493	TGCGACCATGTTCCAGCCCGCGG	23	0.696
hEMX1_exon1_S_74	481	503	TTCCAGCCCGCGGCCAAGCGCGG	23	0.783
hEMX1_exon1_S_75	501	523	CGGCTTTACCATAGAGTCCTTGG	23	0.522
hEMX1_exon1_S_76	504	526	CTTTACCATAGAGTCCTTGGTGG	23	0.478
hEMX1_exon1_S_77	510	532	CATAGAGTCCTTGGTGGCCAAGG	23	0.565
hEMX1_exon1_S_78	514	536	GAGTCCTTGGTGGCCAAGGACGG	23	0.652
hEMX1_exon1_S_79	517	539	TCCTTGGTGGCCAAGGACGGCGG	23	0.696
hEMX1_exon1_S_80	523	545	GTGGCCAAGGACGGCGGCACCGG	23	0.783
hEMX1_exon1_S_93	564	586	GGGCGCGGGCTCCCATCTCCTGG	23	0.783
hEMX1_exon1_S_94	567	589	CGCGGGCTCCCATCTCCTGGCGG	23	0.783
hEMX1_exon1_S_95	570	592	GGGCTCCCATCTCCTGGCGGCGG	23	0.783
hEMX1_exon1_S_97	593	615	CCGCCTCCGAGGAACCGCTCCGG	23	0.783
hEMX1_exon1_S_98	600	622	CGAGGAACCGCTCCGGCCCACGG	23	0.783
hEMX1_exon1_S_99	627	649	CAACTACCCTCACCCCAGCGCGG	23	0.696
hEMX1_exon1_S_102	649	671	GCCGAGGCGGCCTTCGTGAGTGG	23	0.739
hEMX1_exon1_S_103	663	685	CGTGAGTGGCTTCCCTGCCGCGG	23	0.739
hEMX1_exon1_S_109	697	719	GCGGGCCGCTCGCTCTACGGTGG	23	0.783
hEMX1_exon1_S_110	698	720	CGGGCCGCTCGCTCTACGGTGGG	23	0.783
hEMX1_exon1_S_111	720	742	GCCCGAGCTCGTGTTCCCCGAGG	23	0.739
hEMX1_exon1_S_112	753	775	CCCCGCGCTGACCGTGCATCCGG	23	0.783
hEMX1_exon1_S_113	765	787	CGTGCATCCGGCGCACCAGCTGG	23	0.739
hEMX1_exon1_S_114	766	788	GTGCATCCGGCGCACCAGCTGGG	23	0.739
hEMX1_exon1_S_115	802	824	CAGCCCCCGCACTCCTTCTTCGG	23	0.696
hEMX1_exon1_S_116	815	837	CCTTCTTCGGCGCCCAGCACCGG	23	0.739
hEMX1_exon1_S_117	816	838	CTTCTTCGGCGCCCAGCACCGGG	23	0.739
hEMX1_exon1_S_118	839	861	ACCCTCTCCATTTCTACCCCTGG	23	0.565
hEMX1_exon1_S_119	840	862	CCCTCTCCATTTCTACCCCTGGG	23	0.609
hEMX1_exon1_S_120	848	870	ATTTCTACCCCTGGGTCCTGCGG	23	0.609
hEMX1_exon1_S_121	862	884	GTCCTGCGGAACCGCTTCTTCGG	23	0.652
hEMX1_exon1_S_122	876	898	CTTCTTCGGCCACCGCTTCCAGG	23	0.652
hEMX1_exon1_A_1	873	895	GGAAGCGGTGGCCGAAGAAGCGG	23	0.696
hEMX1_exon1_A_2	864	886	GGCCGAAGAAGCGGTTCCGCAGG	23	0.696
hEMX1_exon1_A_3	857	879	GAAGCGGTTCCGCAGGACCCAGG	23	0.696
hEMX1_exon1_A_4	856	878	AAGCGGTTCCGCAGGACCCAGGG	23	0.696
hEMX1_exon1_A_5	855	877	AGCGGTTCCGCAGGACCCAGGGG	23	0.739
hEMX1_exon1_A_6	846	868	GCAGGACCCAGGGGTAGAAATGG	23	0.609
hEMX1_exon1_A_7	841	863	ACCCAGGGGTAGAAATGGAGAGG	23	0.565
hEMX1_exon1_A_8	840	862	CCCAGGGGTAGAAATGGAGAGGG	23	0.609
hEMX1_exon1_A_9	834	856	GGTAGAAATGGAGAGGGTCCCGG	23	0.609
hEMX1_exon1_A_10	828	850	AATGGAGAGGGTCCCGGTGCTGG	23	0.652
hEMX1_exon1_A_11	827	849	ATGGAGAGGGTCCCGGTGCTGGG	23	0.696
hEMX1_exon1_A_12	815	837	CCGGTGCTGGGCGCCGAAGAAGG	23	0.739
hEMX1_exon1_A_13	808	830	TGGGCGCCGAAGAAGGAGTGCGG	23	0.696
hEMX1_exon1_A_14	807	829	GGGCGCCGAAGAAGGAGTGCGGG	23	0.739
hEMX1_exon1_A_15	806	828	GGCGCCGAAGAAGGAGTGCGGGG	23	0.739
hEMX1_exon1_A_16	805	827	GCGCCGAAGAAGGAGTGCGGGGG	23	0.739
hEMX1_exon1_A_17	796	818	AAGGAGTGCGGGGGCTGCAGCGG	23	0.739
hEMX1_exon1_A_18	795	817	AGGAGTGCGGGGGCTGCAGCGGG	23	0.783
hEMX1_exon1_A_23	764	786	CAGCTGGTGCGCCGGATGCACGG	23	0.739
hEMX1_exon1_A_24	755	777	CGCCGGATGCACGGTCAGCGCGG	23	0.783
hEMX1_exon1_A_25	754	776	GCCGGATGCACGGTCAGCGCGGG	23	0.783
hEMX1_exon1_A_26	753	775	CCGGATGCACGGTCAGCGCGGGG	23	0.783
hEMX1_exon1_A_27	750	772	GATGCACGGTCAGCGCGGGGTGG	23	0.739
hEMX1_exon1_A_28	743	765	GGTCAGCGCGGGGTGGTTCATGG	23	0.696
hEMX1_exon1_A_29	737	759	CGCGGGGTGGTTCATGGCCTCGG	23	0.739
hEMX1_exon1_A_30	736	758	GCGGGGTGGTTCATGGCCTCGGG	23	0.739
hEMX1_exon1_A_31	735	757	CGGGGTGGTTCATGGCCTCGGGG	23	0.739
hEMX1_exon1_A_32	722	744	GGCCTCGGGGAACACGAGCTCGG	23	0.739
hEMX1_exon1_A_33	721	743	GCCTCGGGGAACACGAGCTCGGG	23	0.739
hEMX1_exon1_A_34	702	724	CGGGCCCACCGTAGAGCGAGCGG	23	0.783
hEMX1_exon1_A_40	659	681	GGCAGGGAAGCCACTCACGAAGG	23	0.652
hEMX1_exon1_A_41	650	672	GCCACTCACGAAGGCCGCCTCGG	23	0.739
hEMX1_exon1_A_47	617	639	GTGAGGGTAGTTGAGCGCCGTGG	23	0.652
hEMX1_exon1_A_48	616	638	TGAGGGTAGTTGAGCGCCGTGGG	23	0.652
hEMX1_exon1_A_49	612	634	GGTAGTTGAGCGCCGTGGGCCGG	23	0.739
hEMX1_exon1_A_50	607	629	TTGAGCGCCGTGGGCCGGAGCGG	23	0.783
hEMX1_exon1_A_51	599	621	CGTGGGCCGGAGCGGTTCCTCGG	23	0.783
hEMX1_exon1_A_52	596	618	GGGCCGGAGCGGTTCCTCGGAGG	23	0.783
hEMX1_exon1_A_53	593	615	CCGGAGCGGTTCCTCGGAGGCGG	23	0.783
hEMX1_exon1_A_55	576	598	AGGCGGCCGCCGCCAGGAGATGG	23	0.783
hEMX1_exon1_A_59	518	540	GCCGCCGTCCTTGGCCACCAAGG	23	0.739
hEMX1_exon1_A_60	509	531	CTTGGCCACCAAGGACTCTATGG	23	0.565
hEMX1_exon1_A_61	494	516	CTCTATGGTAAAGCCGCGCTTGG	23	0.565
hEMX1_exon1_A_62	488	510	GGTAAAGCCGCGCTTGGCCGCGG	23	0.739
hEMX1_exon1_A_63	487	509	GTAAAGCCGCGCTTGGCCGCGGG	23	0.739
hEMX1_exon1_A_65	476	498	CTTGGCCGCGGGCTGGAACATGG	23	0.696
hEMX1_exon1_A_66	464	486	CTGGAACATGGTCGCAGCCGCGG	23	0.696
hEMX1_exon1_A_67	463	485	TGGAACATGGTCGCAGCCGCGGG	23	0.696
hEMX1_exon1_A_68	451	473	GCAGCCGCGGGAGCTGTGCGAGG	23	0.783
hEMX1_exon1_A_69	444	466	CGGGAGCTGTGCGAGGCAGCCGG	23	0.783
hEMX1_exon1_A_70	443	465	GGGAGCTGTGCGAGGCAGCCGGG	23	0.783
hEMX1_exon1_A_71	437	459	TGTGCGAGGCAGCCGGGCTCTGG	23	0.739
hEMX1_exon1_A_72	436	458	GTGCGAGGCAGCCGGGCTCTGGG	23	0.783
hEMX1_exon1_A_73	435	457	TGCGAGGCAGCCGGGCTCTGGGG	23	0.783
hEMX1_exon1_A_74	418	440	CTGGGGAGCGCTCCGCGTCCTGG	23	0.783
hEMX1_exon1_A_78	384	406	TGCGGGGTGTGCACCCAGCCAGG	23	0.739
hEMX1_exon1_A_88	272	294	GGTGTGTGAGCGAGCGACCGCGG	23	0.739
hEMX1_exon1_A_89	271	293	GTGTGTGAGCGAGCGACCGCGGG	23	0.739
hEMX1_exon1_A_90	270	292	TGTGTGAGCGAGCGACCGCGGGG	23	0.739
hEMX1_exon1_A_92	252	274	CGGGGTCCGGCCACAGCGTACGG	23	0.783
hEMX1_exon1_A_93	247	269	TCCGGCCACAGCGTACGGCCAGG	23	0.739
hEMX1_exon1_A_94	242	264	CCACAGCGTACGGCCAGGCGCGG	23	0.783
hEMX1_exon1_A_101	199	221	GCAGCTCCAGGCGCCCGCACAGG	23	0.783
hEMX1_exon1_A_104	181	203	ACAGGCGCGGGCTCCGTGCTAGG	23	0.739
hEMX1_exon1_A_105	162	184	TAGGCTGCGAGCTGCCAGTAAGG	23	0.609
hEMX1_exon1_A_106	155	177	CGAGCTGCCAGTAAGGCCCGAGG	23	0.696
hEMX1_exon1_A_107	154	176	GAGCTGCCAGTAAGGCCCGAGGG	23	0.696
hEMX1_exon1_A_108	130	152	TGAGCTCGTCTCCCTCCTTTCGG	23	0.609
hEMX1_exon1_A_109	119	141	CCCTCCTTTCGGAGTCCCGCTGG	23	0.696
hEMX1_exon1_A_110	118	140	CCTCCTTTCGGAGTCCCGCTGGG	23	0.696
hEMX1_exon1_A_114	40	62	CGCTGCGAGGCGCGAGTTAGCGG	23	0.739
hEMX1_exon1_A_115	39	61	GCTGCGAGGCGCGAGTTAGCGGG	23	0.739
hEMX1_exon1_A_116	14	36	CCTGCCCCGCGCTCGCCCATTGG	23	0.783
hEMX1_exon2_S_1	15	37	CAGGACGGGCTGCTTCTGCACGG	23	0.696
hEMX1_exon2_S_2	40	62	CCTTCGCACGCAAGCCCAAGCGG	23	0.696
hEMX1_exon2_S_3	50	72	CAAGCCCAAGCGGATCCGCACGG	23	0.696
hEMX1_exon2_S_4	76	98	TCTCGCCCTCGCAGCTGCTGCGG	23	0.739
hEMX1_exon2_S_5	80	102	GCCCTCGCAGCTGCTGCGGCTGG	23	0.783
hEMX1_exon2_S_6	110	132	CTTCGAGAAGAACCACTACGTGG	23	0.522
hEMX1_exon2_S_7	113	135	CGAGAAGAACCACTACGTGGTGG	23	0.565
hEMX1_exon2_S_8	114	136	GAGAAGAACCACTACGTGGTGGG	23	0.565
hEMX1_exon2_S_9	124	146	ACTACGTGGTGGGCGCCGAGCGG	23	0.739
hEMX1_exon2_S_10	134	156	GGGCGCCGAGCGGAAGCAGCTGG	23	0.783
hEMX1_exon2_S_11	138	160	GCCGAGCGGAAGCAGCTGGCCGG	23	0.783
hEMX1_exon2_A_1	157	179	CTCGGAGAGGCTGAGACTGCCGG	23	0.696
hEMX1_exon2_A_2	139	161	GCCGGCCAGCTGCTTCCGCTCGG	23	0.783
hEMX1_exon2_A_3	122	144	GCTCGGCGCCCACCACGTAGTGG	23	0.739
hEMX1_exon2_A_4	109	131	CACGTAGTGGTTCTTCTCGAAGG	23	0.522
hEMX1_exon2_A_5	82	104	CTCCAGCCGCAGCAGCTGCGAGG	23	0.739
hEMX1_exon2_A_6	81	103	TCCAGCCGCAGCAGCTGCGAGGG	23	0.739
hEMX1_exon2_A_7	73	95	CAGCAGCTGCGAGGGCGAGAAGG	23	0.696
hEMX1_exon2_A_8	65	87	GCGAGGGCGAGAAGGCCGTGCGG	23	0.783
hEMX1_exon2_A_9	55	77	GAAGGCCGTGCGGATCCGCTTGG	23	0.696
hEMX1_exon2_A_10	54	76	AAGGCCGTGCGGATCCGCTTGGG	23	0.696
hEMX1_exon2_A_11	40	62	CCGCTTGGGCTTGCGTGCGAAGG	23	0.696
hEMX1_exon2_A_12	39	61	CGCTTGGGCTTGCGTGCGAAGGG	23	0.696
hEMX1_exon2_A_13	38	60	GCTTGGGCTTGCGTGCGAAGGGG	23	0.696
hEMX1_exon2_A_14	14	36	CGTGCAGAAGCAGCCCGTCCTGG	23	0.696
hEMX1_exon2_A_15	13	35	GTGCAGAAGCAGCCCGTCCTGGG	23	0.696
hEMX1_exon2_A_16	12	34	TGCAGAAGCAGCCCGTCCTGGGG	23	0.696
hEMX1_exon2_A_17	1	23	CCCGTCCTGGGGCACGTCGCTGG	23	0.783
hEMX1_exon3_S_1	2	24	TGAAGGTGTGGTTCCAGAACCGG	23	0.565
hEMX1_exon3_S_2	5	27	AGGTGTGGTTCCAGAACCGGAGG	23	0.609
hEMX1_exon3_S_3	20	42	ACCGGAGGACAAAGTACAAACGG	23	0.522
hEMX1_exon3_S_4	30	52	AAAGTACAAACGGCAGAAGCTGG	23	0.478
hEMX1_exon3_S_5	33	55	GTACAAACGGCAGAAGCTGGAGG	23	0.565
hEMX1_exon3_S_6	36	58	CAAACGGCAGAAGCTGGAGGAGG	23	0.609
hEMX1_exon3_S_7	40	62	CGGCAGAAGCTGGAGGAGGAAGG	23	0.652
hEMX1_exon3_S_8	41	63	GGCAGAAGCTGGAGGAGGAAGGG	23	0.652
hEMX1_exon3_S_9	66	88	TGAGTCCGAGCAGAAGAAGAAGG	23	0.522
hEMX1_exon3_S_10	67	89	GAGTCCGAGCAGAAGAAGAAGGG	23	0.565
hEMX1_exon3_S_11	86	108	AGGGCTCCCATCACATCAACCGG	23	0.609
hEMX1_exon3_S_12	89	111	GCTCCCATCACATCAACCGGTGG	23	0.609
hEMX1_exon3_S_13	108	130	GTGGCGCATTGCCACGAAGCAGG	23	0.652
hEMX1_exon3_S_14	115	137	ATTGCCACGAAGCAGGCCAATGG	23	0.565
hEMX1_exon3_S_15	116	138	TTGCCACGAAGCAGGCCAATGGG	23	0.609
hEMX1_exon3_S_16	117	139	TGCCACGAAGCAGGCCAATGGGG	23	0.652
hEMX1_exon3_S_17	120	142	CACGAAGCAGGCCAATGGGGAGG	23	0.652
hEMX1_exon3_S_18	147	169	CGATGTCACCTCCAATGACTAGG	23	0.522
hEMX1_exon3_S_19	148	170	GATGTCACCTCCAATGACTAGGG	23	0.522
hEMX1_exon3_S_20	151	173	GTCACCTCCAATGACTAGGGTGG	23	0.565
hEMX1_exon3_S_21	152	174	TCACCTCCAATGACTAGGGTGGG	23	0.565
hEMX1_exon3_S_22	171	193	TGGGCAACCACAAACCCACGAGG	23	0.609
hEMX1_exon3_S_23	172	194	GGGCAACCACAAACCCACGAGGG	23	0.652
hEMX1_exon3_S_24	193	215	GGCAGAGTGCTGCTTGCTGCTGG	23	0.652
hEMX1_exon3_S_25	198	220	AGTGCTGCTTGCTGCTGGCCAGG	23	0.652
hEMX1_exon3_S_26	209	231	CTGCTGGCCAGGCCCCTGCGTGG	23	0.783
hEMX1_exon3_S_27	210	232	TGCTGGCCAGGCCCCTGCGTGGG	23	0.783
hEMX1_exon3_S_28	220	242	GCCCCTGCGTGGGCCCAAGCTGG	23	0.783
hEMX1_exon3_S_29	227	249	CGTGGGCCCAAGCTGGACTCTGG	23	0.696
hEMX1_exon3_S_30	238	260	GCTGGACTCTGGCCACTCCCTGG	23	0.696
hEMX1_exon3_S_31	243	265	ACTCTGGCCACTCCCTGGCCAGG	23	0.696
hEMX1_exon3_S_32	249	271	GCCACTCCCTGGCCAGGCTTTGG	23	0.696
hEMX1_exon3_S_33	250	272	CCACTCCCTGGCCAGGCTTTGGG	23	0.696
hEMX1_exon3_S_34	251	273	CACTCCCTGGCCAGGCTTTGGGG	23	0.696
hEMX1_exon3_S_35	254	276	TCCCTGGCCAGGCTTTGGGGAGG	23	0.696
hEMX1_exon3_S_36	259	281	GGCCAGGCTTTGGGGAGGCCTGG	23	0.739
hEMX1_exon3_S_37	267	289	TTTGGGGAGGCCTGGAGTCATGG	23	0.609
hEMX1_exon3_S_38	276	298	GCCTGGAGTCATGGCCCCACAGG	23	0.696
hEMX1_exon3_S_39	277	299	CCTGGAGTCATGGCCCCACAGGG	23	0.696
hEMX1_exon3_S_40	289	311	GCCCCACAGGGCTTGAAGCCCGG	23	0.739
hEMX1_exon3_S_41	290	312	CCCCACAGGGCTTGAAGCCCGGG	23	0.739
hEMX1_exon3_S_42	291	313	CCCACAGGGCTTGAAGCCCGGGG	23	0.739
hEMX1_exon3_S_43	307	329	CCCGGGGCCGCCATTGACAGAGG	23	0.739
hEMX1_exon3_S_44	308	330	CCGGGGCCGCCATTGACAGAGGG	23	0.739
hEMX1_exon3_S_45	319	341	ATTGACAGAGGGACAAGCAATGG	23	0.478
hEMX1_exon3_S_46	320	342	TTGACAGAGGGACAAGCAATGGG	23	0.522
hEMX1_exon3_S_47	324	346	CAGAGGGACAAGCAATGGGCTGG	23	0.609
hEMX1_exon3_S_48	330	352	GACAAGCAATGGGCTGGCTGAGG	23	0.609
hEMX1_exon3_S_49	335	357	GCAATGGGCTGGCTGAGGCCTGG	23	0.696
hEMX1_exon3_S_50	336	358	CAATGGGCTGGCTGAGGCCTGGG	23	0.696
hEMX1_exon3_S_51	345	367	GGCTGAGGCCTGGGACCACTTGG	23	0.696
hEMX1_exon3_S_52	357	379	GGACCACTTGGCCTTCTCCTCGG	23	0.652
hEMX1_exon3_S_53	374	396	CCTCGGAGAGCCTGCCTGCCTGG	23	0.739
hEMX1_exon3_S_54	375	397	CTCGGAGAGCCTGCCTGCCTGGG	23	0.739
hEMX1_exon3_S_55	378	400	GGAGAGCCTGCCTGCCTGGGCGG	23	0.783
hEMX1_exon3_S_56	379	401	GAGAGCCTGCCTGCCTGGGCGGG	23	0.783
hEMX1_exon3_S_58	513	535	CCCAGTGTCCCCCTTCCCTATGG	23	0.652
hEMX1_exon3_S_59	514	536	CCAGTGTCCCCCTTCCCTATGGG	23	0.652
hEMX1_exon3_S_60	545	567	AAGTCTCTCTCTTAATGACACGG	23	0.435
hEMX1_exon3_S_61	546	568	AGTCTCTCTCTTAATGACACGGG	23	0.478
hEMX1_exon3_S_62	572	594	CCAGCTCCAGCCCCAGAGCCTGG	23	0.739
hEMX1_exon3_S_63	573	595	CAGCTCCAGCCCCAGAGCCTGGG	23	0.739
hEMX1_exon3_S_64	574	596	AGCTCCAGCCCCAGAGCCTGGGG	23	0.739
hEMX1_exon3_S_65	577	599	TCCAGCCCCAGAGCCTGGGGTGG	23	0.739
hEMX1_exon3_S_66	587	609	GAGCCTGGGGTGGTAGATTCCGG	23	0.652
hEMX1_exon3_S_67	595	617	GGTGGTAGATTCCGGCTCTGAGG	23	0.609
hEMX1_exon3_S_68	596	618	GTGGTAGATTCCGGCTCTGAGGG	23	0.609
hEMX1_exon3_S_69	603	625	ATTCCGGCTCTGAGGGCCAGTGG	23	0.652
hEMX1_exon3_S_70	604	626	TTCCGGCTCTGAGGGCCAGTGGG	23	0.696
hEMX1_exon3_S_71	605	627	TCCGGCTCTGAGGGCCAGTGGGG	23	0.739
hEMX1_exon3_S_72	606	628	CCGGCTCTGAGGGCCAGTGGGGG	23	0.783
hEMX1_exon3_S_73	610	632	CTCTGAGGGCCAGTGGGGGCTGG	23	0.739
hEMX1_exon3_S_74	629	651	CTGGTAGAGCAAACGCGTTCAGG	23	0.565
hEMX1_exon3_S_75	630	652	TGGTAGAGCAAACGCGTTCAGGG	23	0.565
hEMX1_exon3_S_76	635	657	GAGCAAACGCGTTCAGGGCCTGG	23	0.652
hEMX1_exon3_S_77	636	658	AGCAAACGCGTTCAGGGCCTGGG	23	0.652
hEMX1_exon3_S_78	643	665	GCGTTCAGGGCCTGGGAGCCTGG	23	0.739
hEMX1_exon3_S_79	644	666	CGTTCAGGGCCTGGGAGCCTGGG	23	0.739
hEMX1_exon3_S_80	645	667	GTTCAGGGCCTGGGAGCCTGGGG	23	0.739
hEMX1_exon3_S_81	648	670	CAGGGCCTGGGAGCCTGGGGTGG	23	0.783
hEMX1_exon3_S_82	649	671	AGGGCCTGGGAGCCTGGGGTGGG	23	0.783
hEMX1_exon3_S_84	656	678	GGGAGCCTGGGGTGGGGTACTGG	23	0.739
hEMX1_exon3_S_85	659	681	AGCCTGGGGTGGGGTACTGGTGG	23	0.696
hEMX1_exon3_S_86	662	684	CTGGGGTGGGGTACTGGTGGAGG	23	0.696
hEMX1_exon3_S_87	663	685	TGGGGTGGGGTACTGGTGGAGGG	23	0.696
hEMX1_exon3_S_88	664	686	GGGGTGGGGTACTGGTGGAGGGG	23	0.739
hEMX1_exon3_S_89	665	687	GGGTGGGGTACTGGTGGAGGGGG	23	0.739
hEMX1_exon3_S_90	671	693	GGTACTGGTGGAGGGGGTCAAGG	23	0.652
hEMX1_exon3_S_91	672	694	GTACTGGTGGAGGGGGTCAAGGG	23	0.652
hEMX1_exon3_S_97	735	757	TCTACCTCCAGCTCCACAGCAGG	23	0.609
hEMX1_exon3_S_98	744	766	AGCTCCACAGCAGGAGAAACAGG	23	0.565
hEMX1_exon3_S_99	755	777	AGGAGAAACAGGCTAGACATAGG	23	0.478
hEMX1_exon3_S_100	756	778	GGAGAAACAGGCTAGACATAGGG	23	0.522
hEMX1_exon3_S_101	760	782	AAACAGGCTAGACATAGGGAAGG	23	0.478
hEMX1_exon3_S_102	761	783	AACAGGCTAGACATAGGGAAGGG	23	0.522
hEMX1_exon3_S_103	779	801	AAGGGCCATCCTGTATCTTGAGG	23	0.522
hEMX1_exon3_S_104	780	802	AGGGCCATCCTGTATCTTGAGGG	23	0.565
hEMX1_exon3_S_105	783	805	GCCATCCTGTATCTTGAGGGAGG	23	0.565
hEMX1_exon3_S_106	788	810	CCTGTATCTTGAGGGAGGACAGG	23	0.565
hEMX1_exon3_S_107	794	816	TCTTGAGGGAGGACAGGCCCAGG	23	0.652
hEMX1_exon3_S_108	816	838	GTCTTTCTTAACGTATTGAGAGG	23	0.391
hEMX1_exon3_S_109	819	841	TTTCTTAACGTATTGAGAGGTGG	23	0.391
hEMX1_exon3_S_110	820	842	TTCTTAACGTATTGAGAGGTGGG	23	0.435
hEMX1_exon3_S_111	827	849	CGTATTGAGAGGTGGGAATCAGG	23	0.522
hEMX1_exon3_S_112	833	855	GAGAGGTGGGAATCAGGCCCAGG	23	0.652
hEMX1_exon3_S_113	844	866	ATCAGGCCCAGGTAGTTCAATGG	23	0.522
hEMX1_exon3_S_114	845	867	TCAGGCCCAGGTAGTTCAATGGG	23	0.565
hEMX1_exon3_S_115	850	872	CCCAGGTAGTTCAATGGGAGAGG	23	0.565
hEMX1_exon3_S_116	851	873	CCAGGTAGTTCAATGGGAGAGGG	23	0.565
hEMX1_exon3_S_117	881	903	TTCCCTCTGCCTAGAGACTCTGG	23	0.565
hEMX1_exon3_S_118	884	906	CCTCTGCCTAGAGACTCTGGTGG	23	0.609
hEMX1_exon3_S_119	899	921	TCTGGTGGCTTCTCCAGTTGAGG	23	0.565
hEMX1_exon3_S_120	911	933	TCCAGTTGAGGAGAAACCAGAGG	23	0.522
hEMX1_exon3_S_121	916	938	TTGAGGAGAAACCAGAGGAAAGG	23	0.478
hEMX1_exon3_S_122	917	939	TGAGGAGAAACCAGAGGAAAGGG	23	0.522
hEMX1_exon3_S_123	918	940	GAGGAGAAACCAGAGGAAAGGGG	23	0.565
hEMX1_exon3_S_124	921	943	GAGAAACCAGAGGAAAGGGGAGG	23	0.565
hEMX1_exon3_S_125	926	948	ACCAGAGGAAAGGGGAGGATTGG	23	0.565
hEMX1_exon3_S_126	927	949	CCAGAGGAAAGGGGAGGATTGGG	23	0.609
hEMX1_exon3_S_127	928	950	CAGAGGAAAGGGGAGGATTGGGG	23	0.609
hEMX1_exon3_S_128	933	955	GAAAGGGGAGGATTGGGGTCTGG	23	0.609
hEMX1_exon3_S_129	934	956	AAAGGGGAGGATTGGGGTCTGGG	23	0.609
hEMX1_exon3_S_130	935	957	AAGGGGAGGATTGGGGTCTGGGG	23	0.652
hEMX1_exon3_S_131	936	958	AGGGGAGGATTGGGGTCTGGGGG	23	0.696
hEMX1_exon3_S_132	939	961	GGAGGATTGGGGTCTGGGGGAGG	23	0.696
hEMX1_exon3_S_133	940	962	GAGGATTGGGGTCTGGGGGAGGG	23	0.696
hEMX1_exon3_S_134	957	979	GGAGGGAACACCATTCACAAAGG	23	0.522
hEMX1_exon3_S_135	964	986	ACACCATTCACAAAGGCTGACGG	23	0.522
hEMX1_exon3_S_136	983	1005	ACGGTTCCAGTCCGAAGTCGTGG	23	0.609
hEMX1_exon3_S_137	984	1006	CGGTTCCAGTCCGAAGTCGTGGG	23	0.652
hEMX1_exon3_S_138	993	1015	TCCGAAGTCGTGGGCCCACCAGG	23	0.696
hEMX1_exon3_S_139	1011	1033	CCAGGATGCTCACCTGTCCTTGG	23	0.609
hEMX1_exon3_S_140	1022	1044	ACCTGTCCTTGGAGAACCGCTGG	23	0.609
hEMX1_exon3_S_141	1023	1045	CCTGTCCTTGGAGAACCGCTGGG	23	0.652
hEMX1_exon3_S_142	1027	1049	TCCTTGGAGAACCGCTGGGCAGG	23	0.652
hEMX1_exon3_S_143	1046	1068	CAGGTTGAGACTGCAGAGACAGG	23	0.565
hEMX1_exon3_S_144	1047	1069	AGGTTGAGACTGCAGAGACAGGG	23	0.565
hEMX1_exon3_S_145	1054	1076	GACTGCAGAGACAGGGCTTAAGG	23	0.565
hEMX1_exon3_A_1	1082	1104	AGTCACTGGGGACTGGTTGCAGG	23	0.609
hEMX1_exon3_A_2	1038	1060	TGCAGTCTCAACCTGCCCAGCGG	23	0.652
hEMX1_exon3_A_3	1028	1050	ACCTGCCCAGCGGTTCTCCAAGG	23	0.652
hEMX1_exon3_A_4	1023	1045	CCCAGCGGTTCTCCAAGGACAGG	23	0.652
hEMX1_exon3_A_5	1011	1033	CCAAGGACAGGTGAGCATCCTGG	23	0.609
hEMX1_exon3_A_6	1008	1030	AGGACAGGTGAGCATCCTGGTGG	23	0.609
hEMX1_exon3_A_7	1007	1029	GGACAGGTGAGCATCCTGGTGGG	23	0.652
hEMX1_exon3_A_8	994	1016	TCCTGGTGGGCCCACGACTTCGG	23	0.696
hEMX1_exon3_A_9	989	1011	GTGGGCCCACGACTTCGGACTGG	23	0.696
hEMX1_exon3_A_10	967	989	GAACCGTCAGCCTTTGTGAATGG	23	0.522
hEMX1_exon3_A_11	927	949	CCCAATCCTCCCCTTTCCTCTGG	23	0.609
hEMX1_exon3_A_12	912	934	TCCTCTGGTTTCTCCTCAACTGG	23	0.522
hEMX1_exon3_A_13	890	912	GAGAAGCCACCAGAGTCTCTAGG	23	0.565
hEMX1_exon3_A_14	884	906	CCACCAGAGTCTCTAGGCAGAGG	23	0.609
hEMX1_exon3_A_15	883	905	CACCAGAGTCTCTAGGCAGAGGG	23	0.609
hEMX1_exon3_A_16	851	873	CCCTCTCCCATTGAACTACCTGG	23	0.565
hEMX1_exon3_A_17	850	872	CCTCTCCCATTGAACTACCTGGG	23	0.565
hEMX1_exon3_A_18	812	834	TCAATACGTTAAGAAAGACCTGG	23	0.391
hEMX1_exon3_A_19	811	833	CAATACGTTAAGAAAGACCTGGG	23	0.435
hEMX1_exon3_A_20	788	810	CCTGTCCTCCCTCAAGATACAGG	23	0.565
hEMX1_exon3_A_21	784	806	TCCTCCCTCAAGATACAGGATGG	23	0.522
hEMX1_exon3_A_22	748	770	CTAGCCTGTTTCTCCTGCTGTGG	23	0.565
hEMX1_exon3_A_23	742	764	TGTTTCTCCTGCTGTGGAGCTGG	23	0.565
hEMX1_exon3_A_24	739	761	TTCTCCTGCTGTGGAGCTGGAGG	23	0.609
hEMX1_exon3_A_25	728	750	TGGAGCTGGAGGTAGAGACCAGG	23	0.609
hEMX1_exon3_A_26	727	749	GGAGCTGGAGGTAGAGACCAGGG	23	0.652
hEMX1_exon3_A_27	708	730	AGGGTCCCCCAACAAAAGAGAGG	23	0.565
hEMX1_exon3_A_28	661	683	CTCCACCAGTACCCCACCCCAGG	23	0.696
hEMX1_exon3_A_29	653	675	GTACCCCACCCCAGGCTCCCAGG	23	0.739
hEMX1_exon3_A_30	619	641	TTTGCTCTACCAGCCCCCACTGG	23	0.609
hEMX1_exon3_A_31	606	628	CCCCCACTGGCCCTCAGAGCCGG	23	0.783
hEMX1_exon3_A_32	590	612	GAGCCGGAATCTACCACCCCAGG	23	0.652
hEMX1_exon3_A_33	584	606	GAATCTACCACCCCAGGCTCTGG	23	0.609
hEMX1_exon3_A_34	583	605	AATCTACCACCCCAGGCTCTGGG	23	0.609
hEMX1_exon3_A_35	582	604	ATCTACCACCCCAGGCTCTGGGG	23	0.652
hEMX1_exon3_A_36	578	600	ACCACCCCAGGCTCTGGGGCTGG	23	0.739
hEMX1_exon3_A_37	572	594	CCAGGCTCTGGGGCTGGAGCTGG	23	0.739
hEMX1_exon3_A_41	523	545	TTTATTATTCCCATAGGGAAGGG	23	0.391
hEMX1_exon3_A_42	522	544	TTATTATTCCCATAGGGAAGGGG	23	0.435
hEMX1_exon3_A_43	521	543	TATTATTCCCATAGGGAAGGGGG	23	0.478
hEMX1_exon3_A_44	514	536	CCCATAGGGAAGGGGGACACTGG	23	0.652
hEMX1_exon3_A_45	513	535	CCATAGGGAAGGGGGACACTGGG	23	0.652
hEMX1_exon3_A_46	512	534	CATAGGGAAGGGGGACACTGGGG	23	0.652
hEMX1_exon3_A_47	494	516	TGGGGATCACTAAACTACAGTGG	23	0.478
hEMX1_exon3_A_48	487	509	CACTAAACTACAGTGGTGCCTGG	23	0.522
hEMX1_exon3_A_49	450	472	CAGAAATGCATCAAAACAAAAGG	23	0.348
hEMX1_exon3_A_50	449	471	AGAAATGCATCAAAACAAAAGGG	23	0.348
hEMX1_exon3_A_51	442	464	CATCAAAACAAAAGGGAGATTGG	23	0.391
hEMX1_exon3_A_52	434	456	CAAAAGGGAGATTGGAGACACGG	23	0.522
hEMX1_exon3_A_53	423	445	TTGGAGACACGGAGAGCAGCTGG	23	0.609
hEMX1_exon3_A_54	422	444	TGGAGACACGGAGAGCAGCTGGG	23	0.652
hEMX1_exon3_A_55	419	441	AGACACGGAGAGCAGCTGGGAGG	23	0.652
hEMX1_exon3_A_56	413	435	GGAGAGCAGCTGGGAGGCTGCGG	23	0.739
hEMX1_exon3_A_57	410	432	GAGCAGCTGGGAGGCTGCGGTGG	23	0.739
hEMX1_exon3_A_58	407	429	CAGCTGGGAGGCTGCGGTGGCGG	23	0.783
hEMX1_exon3_A_59	406	428	AGCTGGGAGGCTGCGGTGGCGGG	23	0.783
hEMX1_exon3_A_65	374	396	CCAGGCAGGCAGGCTCTCCGAGG	23	0.739
hEMX1_exon3_A_66	368	390	AGGCAGGCTCTCCGAGGAGAAGG	23	0.652
hEMX1_exon3_A_67	360	382	TCTCCGAGGAGAAGGCCAAGTGG	23	0.609
hEMX1_exon3_A_68	353	375	GGAGAAGGCCAAGTGGTCCCAGG	23	0.652
hEMX1_exon3_A_69	317	339	ATTGCTTGTCCCTCTGTCAATGG	23	0.478
hEMX1_exon3_A_70	314	336	GCTTGTCCCTCTGTCAATGGCGG	23	0.609
hEMX1_exon3_A_71	308	330	CCCTCTGTCAATGGCGGCCCCGG	23	0.739
hEMX1_exon3_A_72	307	329	CCTCTGTCAATGGCGGCCCCGGG	23	0.739
hEMX1_exon3_A_73	292	314	GCCCCGGGCTTCAAGCCCTGTGG	23	0.739
hEMX1_exon3_A_74	291	313	CCCCGGGCTTCAAGCCCTGTGGG	23	0.739
hEMX1_exon3_A_75	290	312	CCCGGGCTTCAAGCCCTGTGGGG	23	0.739
hEMX1_exon3_A_76	277	299	CCCTGTGGGGCCATGACTCCAGG	23	0.696
hEMX1_exon3_A_77	261	283	CTCCAGGCCTCCCCAAAGCCTGG	23	0.696
hEMX1_exon3_A_78	256	278	GGCCTCCCCAAAGCCTGGCCAGG	23	0.739
hEMX1_exon3_A_79	255	277	GCCTCCCCAAAGCCTGGCCAGGG	23	0.739
hEMX1_exon3_A_80	250	272	CCCAAAGCCTGGCCAGGGAGTGG	23	0.696
hEMX1_exon3_A_81	234	256	GGAGTGGCCAGAGTCCAGCTTGG	23	0.652
hEMX1_exon3_A_82	233	255	GAGTGGCCAGAGTCCAGCTTGGG	23	0.652
hEMX1_exon3_A_83	223	245	AGTCCAGCTTGGGCCCACGCAGG	23	0.696
hEMX1_exon3_A_84	222	244	GTCCAGCTTGGGCCCACGCAGGG	23	0.739
hEMX1_exon3_A_85	221	243	TCCAGCTTGGGCCCACGCAGGGG	23	0.739
hEMX1_exon3_A_86	216	238	CTTGGGCCCACGCAGGGGCCTGG	23	0.783
hEMX1_exon3_A_87	186	208	CAAGCAGCACTCTGCCCTCGTGG	23	0.652
hEMX1_exon3_A_88	185	207	AAGCAGCACTCTGCCCTCGTGGG	23	0.652
hEMX1_exon3_A_89	178	200	ACTCTGCCCTCGTGGGTTTGTGG	23	0.609
hEMX1_exon3_A_90	158	180	TGGTTGCCCACCCTAGTCATTGG	23	0.565
hEMX1_exon3_A_91	155	177	TTGCCCACCCTAGTCATTGGAGG	23	0.565
hEMX1_exon3_A_92	131	153	GACATCGATGTCCTCCCCATTGG	23	0.565
hEMX1_exon3_A_93	119	141	CTCCCCATTGGCCTGCTTCGTGG	23	0.652
hEMX1_exon3_A_94	105	127	GCTTCGTGGCAATGCGCCACCGG	23	0.696
hEMX1_exon3_A_95	93	115	TGCGCCACCGGTTGATGTGATGG	23	0.609
hEMX1_exon3_A_96	92	114	GCGCCACCGGTTGATGTGATGGG	23	0.652
hEMX1_exon3_A_97	71	93	GGAGCCCTTCTTCTTCTGCTCGG	23	0.609
hEMX1_exon3_A_98	64	86	TTCTTCTTCTGCTCGGACTCAGG	23	0.522
hEMX1_exon3_A_99	21	43	GCCGTTTGTACTTTGTCCTCCGG	23	0.565
hEMX1_exon3_A_100	15	37	TGTACTTTGTCCTCCGGTTCTGG	23	0.522
